# Supplementary material
Source: ML conference proceedings conference paper supplement (https://openreview.net/forum?id=W8MjsxHrDpL)
Supplement: supplementary_material [file attachment]

# Supplementary

Anonymous Author(s)

Affiliation

Address

email

## 1 Proof for Synthesizing Navigation Skills by Exploiting Spatial Independence

3 We now formally describe under what conditions we will resolve a manipulation option  $o$  for some  
4 set of starting states  $Z$ . Consider an option  $o$  that has an associated navigation symbol  $\sigma^o$  to char-  
5 acterize part of its initiation set  $I_o$ :  $I_o = \text{Proj}(Z, S_b) \cap \sigma^o$ . Then this implies that if the agent is in  
6 a state that is an element of  $Z$ , and only changes the robot’s mobile base pose to be an element of  
7 the navigation symbol without changing anything else, then the resulting state would be an element  
8 of the initiation set of the option. We prove that if our assumptions regarding the initiation set of a  
9 manipulation option are satisfied, then we can synthesize a locomotive behavior from our navigation  
10 stack using our learned navigation symbol, which means we can generate the navigation stack to  
11 support a specific option. Since the state is Markovian, proving for the more general case where we  
12 aim to generate a navigation stack to support a manipulation plan follows from repeated applications  
13 of Theorem 1, and so we omit it.

14 If a manipulation option’s  $o_i$  initiation set can be written using the definition of spatial independence  
15 (Equation 1) from the current set of states  $Z$ , then sampling a location  $l$  from  $\sigma^{o_i}$  and synthesizing  
16 and executing a path plan from the navigation stack to  $l$  from a start state in  $Z$  is sufficient for  
17 enabling the robot to execute the manipulation option  $o_i$ .

18 **Theorem 1.** *If, for a starting set of states  $Z$ , the initiation set  $I_{o_i}$  for a manipulation option  $o_i \in O$   
19 can be characterized as in Equation 1, then a location  $l$  sampled from the associated navigation  
20 symbol  $l \in \sigma^{o_i}$  can be used in conjunction with a path planner to locomote the robot to a state  $s$   
21 that is within  $I_{o_i}$  the initiation set of  $o_i$  as long as there is a collision-free path.*

22 *Proof.* By our assumptions, we know that the initiation set for the manipulation option can be de-  
23 composed into  $I_o = \text{Proj}(Z, S_b) \cap \sigma_s^o$ . We also assume that the agent starts in a state  $z$  element of  $Z$   
24 ( $z \in Z$ ). We can then use the pose  $l$  that is sampled from the navigation symbol  $\sigma^{o_i}$  to synthesize  
25 a navigation action  $n_i$  that starts from  $z$  and ends at location  $l$ ,  $n_i \in N(z, l)$  as long as there is a  
26 collision free path through the environment. The effect of executing  $n_i$  from  $z$  by definition only  
27 affects spatial state variables  $S_b$ , and so the resulting state is an element of  $\text{Proj}(Z, S_b)$  and also an  
28 element of navigation symbol  $\sigma_s^o$ . Therefore it the resulting state is an element of the intersection of  
29  $\text{Proj}(Z, S_b)$  and  $\sigma_s^o$ , which is by definition the initiation set of  $o_i$  based on the Equation 1.

30

□

## 31 2 Simulation Experiment: Spatial Independence for Learning Symbols

32 Part of the model learning process requires identifying which factors are independence since there  
33 is no a priori assumption about the structure of the initiation and effect sets of the skills. Partitioning  
34 is via DBSCAN clustering [1], and the precondition classifiers are learned using a SVM [2] with  
35 an RBF kernel (hyperparameters are optimized using grid search. The effect density estimation is  
36 performed with a kernel density estimators [3, 4] with a Gaussian kernel, with a grid search over the  
37 bandwidth.

38 To incorporate the spatial independence assumption, we use a simple augmentation to the baseline:  
39 data collection occurs as before, but the spatial state variables are separated from all the other non-  
40 spatial state variables before learning. We then perform model learning exactly as [5], except with  
41 the separated spatial state variables already identified as an independent factor. This difference  
42 represents how the spatial independence assumption can be incorporated into an existing symbol  
43 learning pipeline.

### 44 3 Experiment: Transfer of Learned Abstractions

45 In the second set of experiments, our goal is to evaluate how AOSMs help transfer learned  
46 abstractions to novel environments. For these experiments, we provided a manipulation-  
47 only plan  $p = \{\text{PickUp}(\text{Mug}), \text{ToggleOn}(\text{CoffeeMachine}), \text{ToggleOff}(\text{CoffeeMachine}),$   
48  $\text{PutIn}(\text{Mug}, \text{CoffeeMachine}), \text{MakeCoffee}(\text{Mug}, \text{CoffeeMachine})\}$ . The robot must construct the  
49 navigation symbols that enable it to generate navigation behaviors that enable those actions to be  
50 executed.

#### 51 3.0.1 Approaches

52 For these set of experiments, all of the approaches perform a similar procedure. For a given scene  
53 and current step of the plan  $o$ , the robot 1) uses rejection sampling to sample a pose  $l$  from the  
54 associated navigation symbol  $\sigma^o$  2) uses the path planner to move to location  $l$ , and 3) attempts to  
55 run the manipulation option  $o$ . If the agent fails to successfully execute the manipulation option,  
56 the location  $l$  is added as a negative sample to the dataset used to train  $\sigma^o$ ; the robot repeats these  
57 steps until successful execution. When the robot is successful in executing the manipulation option,  
58 location  $l$  is added as a positive sample to the dataset used to train  $\sigma^o$ , and the robot proceeds to the  
59 next plan step. These navigation symbols are trained using Gaussian Process classifiers [6] with an  
60 RBF kernel.

61 There are two important design choices when learning navigation symbols that can be chosen inde-  
62 pendently of each other: 1) which spatial frame are the navigation symbols learned in, and 2) what  
63 proposal distribution is used for rejection sampling. In [7], the global map frame is used as the spatial  
64 frame and a random distribution for sampling, and we call this baseline **random global**. Learning  
65 symbols in the map frame enables the robot to leverage a path planner to generate navigation behav-  
66 iors, but it means that the robot must relearn the symbols when the scene changes. To exploit the  
67 structure of object-centric skills, an object-centric spatial frame can be used to learn the symbols,  
68 which the agent can transform into a map frame given a semantic map that includes object pose.  
69 This enables the agent to effectively transfer learned information from one map to another. Using an  
70 object-centric frame with a random sampling distribution is akin to the approach in James et al. [8],  
71 which we term **random object**. However, using a uniform distribution as the proposal distribution  
72 is extremely inefficient since the robot will try manipulating objects from locations extremely far  
73 from the object. Kaelbling and Lozano-Pérez [9] proposed exploiting the nature of space using a  
74 geometric heuristic that samples poses near the object, and so we call the baseline that uses the ge-  
75 ometric heuristic for sampling poses and learning in a global map frame **heuristic global**. The final  
76 approach learns in an object-centric spatial frame and uses the geometric heuristic to sample poses,  
77 which to our knowledge has not been used in conjunction to learn symbols. We call this baseline  
78 **heuristic object**, and it corresponds to our assumption. To give an upper-bound on performance, we  
79 also evaluate an oracle, which always samples feasible manipulation locations.

80 To determine how effectively each approach enables learned abstractions to be transferred to differ-  
81 ent environments, we use investigate two experimental settings: when the agent successfully finishes  
82 executing the plan, 1) the scene is reset to the initial configuration and the agent retries executing the  
83 plan (the single-scene setting), and 2) a new scene is chosen and the agent retries executing the plan  
84 (the multi-scene setting). In the single-scene setting there is no need for transfer and the choice of  
85 spatial frame does not matter. This lets us evaluate how important the chosen proposal distribution is

86 for learning navigation symbols. In the multi-scene setting, the agent must also transfer the learned  
87 symbols to different scenes, which lets us evaluate how useful the choice of frame is for transfer.

### 88 3.0.2 Metrics

89 For each task execution in a scene, we report the cumulative total number of manipulation skills the  
90 robot executed, until the plan succeeded.

### 91 3.0.3 Results

92 Results for the single-scene and multi-scene setting for all four approaches are in Figure ?? . The  
93 approaches differ substantially between the single-scene and multi-scene setting. In the single-  
94 scene setting, the heuristic sampler quickly guides the agent towards locations that afford useful  
95 manipulations, when compared to sampling random locations. However, after around 15 episodes,  
96 all of the approaches learn to plan in the single scene, and all approach the oracle’s performance  
97 (which is just the length of the plan). However, in the multi-scene setting, although the heuristic  
98 sampler with global frame starts off better than the random sampler with an object-centric frame,  
99 after about 3 episodes, the object-centric frame with random sampling starts to outperform it. This  
100 is because the global frame approach cannot port across different scenes, whereas object-centric  
101 frames can. Therefore, we see that navigation symbols in an AOSM should be a) learned in an  
102 object-centric frame to support portability to new domains, and b) learned using a sampling process  
103 with geometric information included, rather than sampling at random.

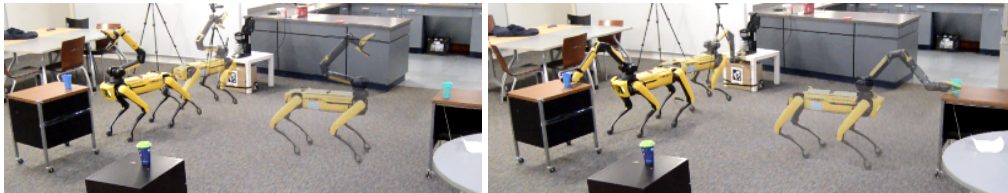

Figure 1: An example demonstration of the Spot building an AOSM and using it to prepare coffee. (Left): Spot navigates around the space, identifies objects, and constructs an AOSM. (Right): With the AOSM and a manipulation-only plan, the Spot can synthesize the navigation abstractions to locomote around the environment to successfully execute the manipulation skills.

## 104 4 Robot Hardware Demonstration

105 Our demonstration of using an AOSM on a real robot can be seen in full detail in Figure 1. We  
106 first manually drive the robot around and use an off-the-shelf SLAM implementation to generate  
107 a 3D geometric map of the environment which the robot can use to navigate to 3D poses. The  
108 robot then constructs a semantic map that captures the spatial pose and semantic attributes of each  
109 of the relevant objects in the scene. Once the robot is equipped with a set of manipulation skills,  
110 it generates an AOSM of the scene using hand-crafted navigation symbols, which enables it to  
111 sample navigation poses that support successfully executing each of its manipulation skills. The  
112 robot then uses a hand-specified PDDL of the coffee preparation task to generate the manipulation-  
113 only plan using Fast Downward, which results in: **PickUp(WaterCup),Pour(WaterCup),**  
114 **Place(WaterCup),PickUp(CoffeeGrinds),Pour(CoffeeGrinds), Place(CoffeeGrinds),** and then  
115 **CloseLid(CoffeeMachine), PushButton(CoffeeMachine).** With the AOSM, the robot can syn-  
116 thesize a navigation stack to support plan execution (Figure 1).

117 We time how long it takes the robot to construct an AOSM in 2 different environments. Navigating  
118 the environment to observe the objects and then constructing the AOSM takes an average of 82.5  
119 seconds. Executing the plan for the coffee preparation task takes on average 140 seconds. These  
120 timings demonstrate the efficacy of AOSMs to enable a robot to rapidly generate the navigation  
121 abstractions for supporting task execution.

122 **References**

- 123 [1] M. Ester, H.-P. Kriegel, J. Sander, X. Xu, et al. A density-based algorithm for discovering  
124 clusters in large spatial databases with noise. In *kdd*, volume 96, pages 226–231, 1996.
- 125 [2] C. Cortes and V. Vapnik. Support-vector networks. *Machine Learning*, 20(3):273–297, 1995.
- 126 [3] M. Rosenblatt. Remarks on some nonparametric estimates of a density function. *The Annals of*  
127 *Mathematical Statistics*, 27(3):832, 1956.
- 128 [4] E. Parzen. On estimation of a probability density function and mode. *The Annals of Mathemat-*  
129 *ical Statistics*, 33(3):1065, 1962.
- 130 [5] S. James, B. Rosman, and G. Konidaris. Autonomous learning of object-centric abstractions for  
131 high-level planning. In *International Conference on Learning Representations*, 2022.
- 132 [6] H. Nickisch and C. Rasmussen. Approximations for binary gaussian process classification.  
133 *Journal of Machine Learning Research*, 9(Oct):2035–2078, 2008.
- 134 [7] G. Konidaris, L. P. Kaelbling, and T. Lozano-Perez. From skills to symbols: Learning symbolic  
135 representations for abstract high-level planning. *Journal of Artificial Intelligence Research*, 61:  
136 215–289, 2018.
- 137 [8] S. James, B. Rosman, and G. Konidaris. Learning portable representations for high-level plan-  
138 ning. In *International Conference on Machine Learning*, pages 4682–4691. PMLR, 2020.
- 139 [9] L. P. Kaelbling and T. Lozano-Pérez. Hierarchical task and motion planning in the now. In *2011*  
140 *IEEE International Conference on Robotics and Automation*, pages 1470–1477. IEEE, 2011.
